# Supplementary material
Source: publisher figshare collection journal article supplement (https://gsapubs.figshare.com/ndownloader/files/39537007)
Supplement: Supplementary file 1 [file 39537007]

## Sheet: Table S5
Table S5. Summary of geochronological data for the Mangling intrusive complex.
Rock type	Sample No.	Dating method	Age (Ma)	Data sources
Biotite diorite enclave	ML20-006	LA-ICP-MS zircon U-Pb	149.6 ± 0.9	This study
MMEs	ML02	LA-ICP-MS titanite U-Pb	149 ± 1	Hu et al., 2017
MMEs	ML06	LA-ICP-MS zircon U-Pb	150 ± 1	Hu et al., 2017
Quartz biorite diorite enclaves	ML-19/2B	LA-ICP-MS zircon U-Pb	150 ± 1	Yang et al., 2014
Biotite diorite	ML20-011	LA-ICP-MS zircon U-Pb	147.6 ± 0.6	This study
Diorite	12QL13	LA-ICP-MS zircon U-Pb	142 ± 1	Zhang et al., 2020
Quartz diorite	ML1703	LA-ICP-MS zircon U-Pb	147 ± 3	Zhang et al., 2019
Quartz diorite	ML1704	LA-ICP-MS zircon U-Pb	148 ± 4	Zhang et al., 2019
Quartz diorite	ML1705	LA-ICP-MS zircon U-Pb	147 ± 1	Zhang et al., 2019
Pyroxene-bearing biotite hornblende diorite	ML-37/1B	LA-ICP-MS zircon U-Pb	157 ± 1	Yang et al., 2014
Medium- to fine-grained monzogranite	ML20-007	LA-ICP-MS zircon U-Pb	144.7 ± 0.6	This study
Medium- to coarse-grained biotite monzogranite	ML-32/1B	LA-ICP-MS zircon U-Pb	144 ± 1	Yang et al., 2014
Porphyritic medium- to coarse-grained monzogranite	09CL257	LA-ICP-MS zircon U-Pb	158.4 ± 1.8	Qin et al., 2012
Porphyritic medium- to coarse-grained monzogranite	09CL264	LA-ICP-MS zircon U-Pb	160.5 ± 1.3	Qin et al., 2012
Porphyritic biotite monzogranite	ML-28/1B	LA-ICP-MS zircon U-Pb	148 ± 1	Yang et al., 2014
Fine-grained monzogranite	ML20-003	LA-ICP-MS zircon U-Pb	142.3 ± 0.9	This study
Monzogranite	14QL15	SIMS zircon U-Pb	141 ± 2 (1773 ± 9 for inherited zircons)	Zhang et al., 2020
Monzogranite	10QL27	SIMS zircon U-Pb	143 ± 1 (1790 ± 7 for inherited zircons)	Zhang et al., 2020
Monzogranite	ML1501	LA-ICP-MS zircon U-Pb	142 ± 3 (1759 ± 76 for inherited zircons)	Zhang et al., 2019
Monzogranite	ML1502	LA-ICP-MS zircon U-Pb	144 ± 5 (1797 ± 56 for inherited zircons)	Zhang et al., 2019
Monzogranite	ML1503	LA-ICP-MS zircon U-Pb	145 ± 3 (1713 ± 65 for inherited zircons)	Zhang et al., 2019
Monzogranite	ML1506	LA-ICP-MS zircon U-Pb	140 ± 4	Zhang et al., 2019
Monzogranite	ML1508	LA-ICP-MS zircon U-Pb	144 ± 3	Zhang et al., 2019
Monzogranite	ML1509	LA-ICP-MS zircon U-Pb	141 ± 2	Zhang et al., 2019
Monzogranite	ML1510	LA-ICP-MS zircon U-Pb	144 ± 3	Zhang et al., 2019
Monzogranite	ML1512	LA-ICP-MS zircon U-Pb	142 ± 3	Zhang et al., 2019
Monzogranite	ML03	LA-ICP-MS titanite U-Pb	148 ± 1	Hu et al., 2017
Monzogranite	ML03	LA-ICP-MS titanite U-Pb	148 ± 2	Hu et al., 2017
Monzogranite	ML29	LA-ICP-MS zircon U-Pb	150 ± 1	Hu et al., 2017
K-feldspar granite	P003-2	LA-ICP-MS zircon U-Pb	141.1 ± 1.1 (152.8 ± 1.4 for inherited zircons)	This study
K-feldspar granite	09CL258	LA-ICP-MS zircon U-Pb	124.1 ± 2.0	Qin et al., 2012
Mafic rocks	ML17	LA-ICP-MS zircon U-Pb	149 ± 1	Hu et al., 2017
References:
Hu, H., Li, J.W., McFarlane, C.R.M., Luo, Y., and McCarron, T., 2017, Textures, trace element compositions, and U–Pb ages of titanite from the Mangling granitoid pluton, East Qinling Orogen: Implications for magma mixing and destruction of the North China Craton: Lithos, v. 284–285, p. 50–68, https://doi.org/10.1016/j.lithos.2017.03.025.
Qin, H.P., Wu, C.L., Wu, X.P., Lei, M., and Hou, Z.H., 2012, LA-ICP-MS Zircon U-Pb ages and implications for tectonic setting of the Mangling granitoid plutons in Qinling Orogen Belt: Geological Review v. 58, p. 783–793 [in Chinese with English abstract].
Yang, Y., Wang, X.X., Ke, C.H., Li, J.B., Lv, X.Q., Meng, X.Y., and Nie, Z.R., 2014, Zircon U–Pb ages, geochemistry and evolution of Mangling pluton in North Qinling Mountains: Mineral Deposits, v. 33, p. 14–36 [in Chinese with English abstract].
Zhang, W.X., Wu, Y.B., and Zhou, G.Y., 2020, Petrochemical and isotopic evidences for multiple sources involving in the generation of post-collisional granitoid complex: A case study of the Mangling complex from the eastern Qinling orogen, China: Lithos, v. 356–357, p. 105377, https://doi.org/10.1016/j.lithos.2020.105377.
Zhang, Y.S., Siebel, W., He, S., Wang, Y., and Chen, F.K., 2019, Origin and genesis of Late Jurassic to Early Cretaceous granites of the North Qinling Terrane, China: Lithos, v. 336–337, p. 242–257, https://doi.org/10.1016/j.lithos.2019.04.008.
